# Supplementary material for: Chromaticity coordinate vector principle for charge-transfer-type thermochromic material design: case of Fe/Cr-(co)doped α-Al2O3host
Source: Royal Society of Chemistry journal article supplement (doi:10.1039/d2tc02287g), 2022-01-01
Supplement: d2tc02287g1.pdf [file d2tc02287g1.pdf]

Supporting Information for

## **Chromaticity Coordinates Vector Principle for Charge-Transfer-Type Thermochromic Material Design: Case in Fe/Cr-(co)doped $\alpha$ -Al<sub>2</sub>O<sub>3</sub> Host**

Wen Zhang <sup>a</sup>, Hongda Xu <sup>a</sup>, Shan Wang<sup>b\*</sup>, Hairui Fang <sup>c</sup>, Tianyi Li<sup>b</sup>, Yumei Zhang <sup>a</sup>, Dongfei Li <sup>a</sup>, Xiangdong Meng <sup>a\*</sup>, Changmin Hou <sup>d</sup>, Long Yuan <sup>a\*</sup>

<sup>a</sup> Key Laboratory of Functional Materials Physics and Chemistry of the Ministry of Education, College of Physics, Jilin Normal University, Changchun 130103, People's Republic of China. Corresponding emails: yuanlong@jlnu.edu.cn (L.Y.); xdmeng@jlnu.edu.cn (X.M.).

<sup>b</sup> Department of Materials Science and Engineering, Jilin Institute of Chemical Technology, 45 Chengde Street, Jilin 132022, People's Republic of China. Corresponding email: wshsmile@hotmail.com (S.W.).

<sup>c</sup> School of Automation Engineering, Northeast Electric Power University, 169 Changchun Road, Jilin 132000, People's Republic of China.

<sup>d</sup> State Key Laboratory of Inorganic Synthesis and Preparative Chemistry, College of Chemistry, Jilin University, 2699 Qianjin Street, Changchun 130012, People's Republic of China.

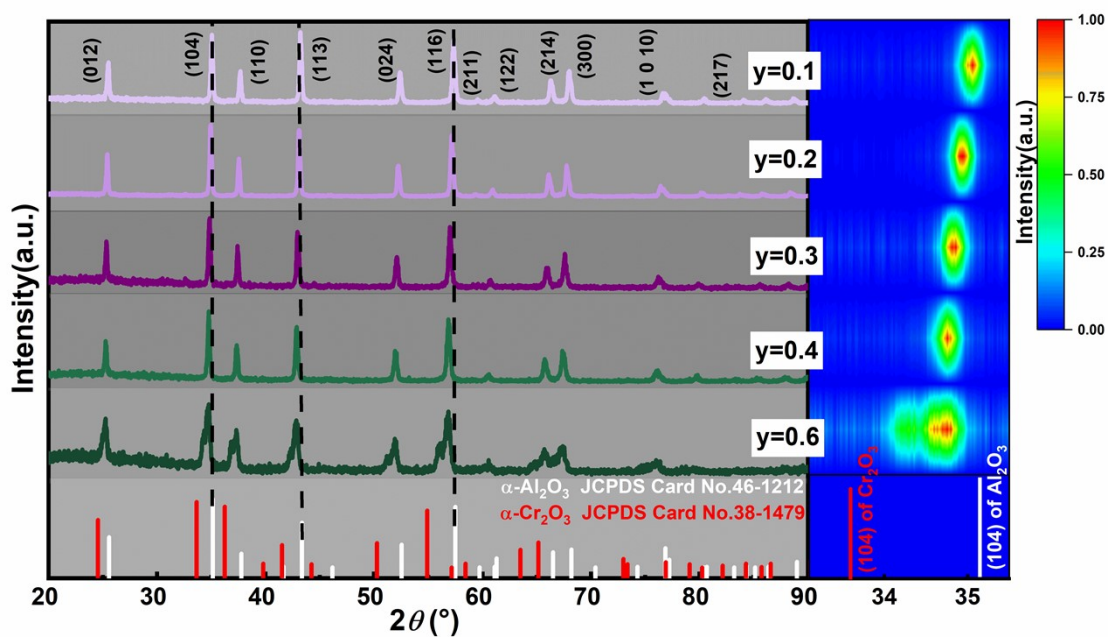

**Fig. S1** Powder X-ray diffraction data of the as-synthesized  $\text{Al}_{2-y}\text{Cr}_y\text{O}_3$  samples. Vertical bars indicate the theoretical diffraction peak positions and the relative intensities of  $\alpha\text{-Al}_2\text{O}_3$  (JCPDS Card No. 46-1212) and  $\alpha\text{-Cr}_2\text{O}_3$  (JCPDS Card No. 38-1479). Dash lines mark the peak positions as a guide for the eye. Right panel depicts the contour maps of (104) diffraction peaks for different samples.

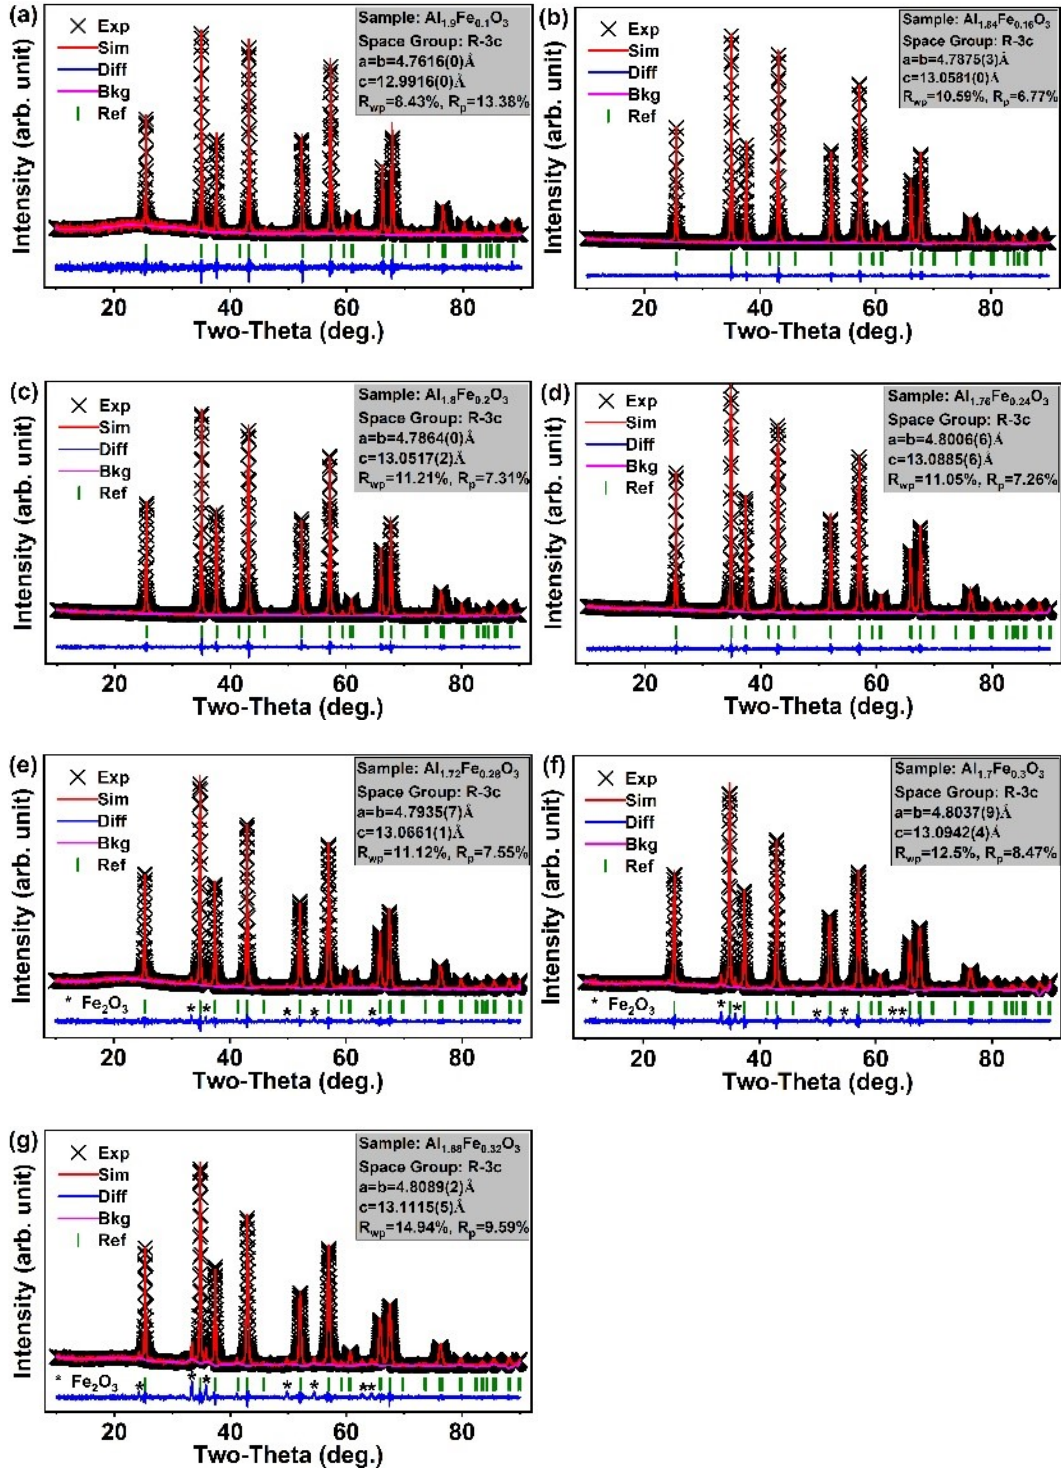

Fig. S2 Rietveld refinement results of the powder x-ray diffraction data of  $\text{Al}_{2-x}\text{Fe}_x\text{O}_3$  samples for (a)  $x=0.10$ , (b)  $x=0.16$ , (c)  $x=0.20$ , (d)  $x=0.24$ , (e)  $x=0.28$ , (f)  $x=0.30$ , and (g)  $x=0.32$ , respectively.

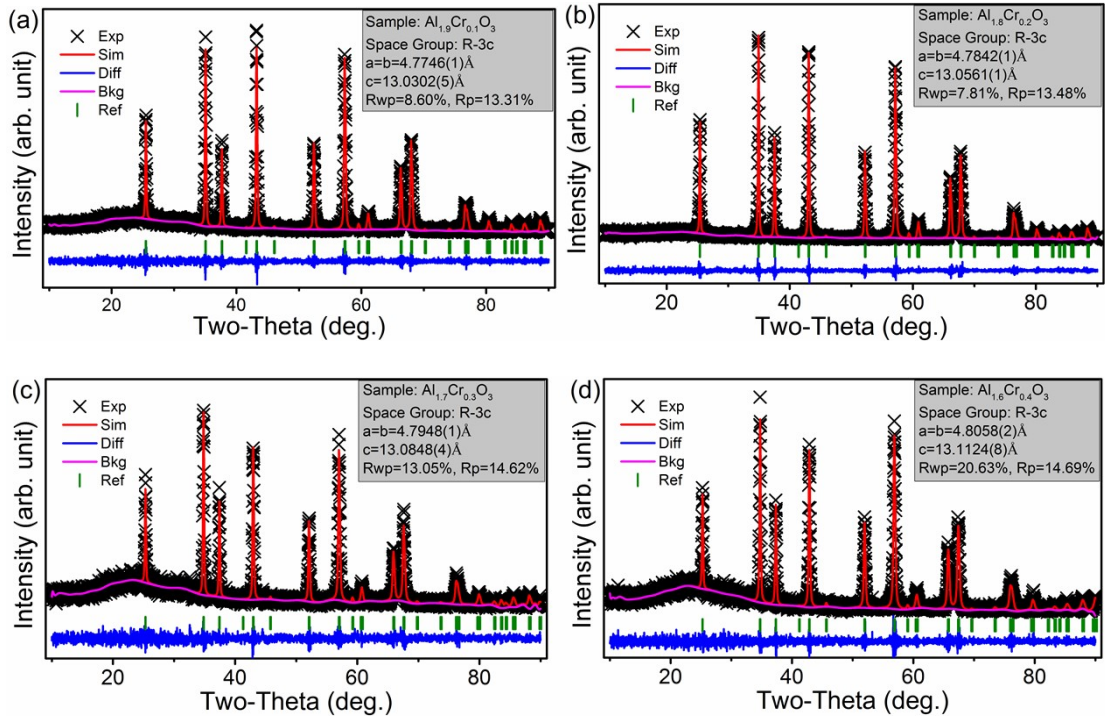

**Fig. S3** Rietveld refinement results of the powder x-ray diffraction data of  $\text{Al}_{2-y}\text{Cr}_y\text{O}_3$  samples for (a)  $y=0.10$ , (b)  $y=0.20$ , (c)  $y=0.30$ , (d)  $y=0.40$ , respectively.

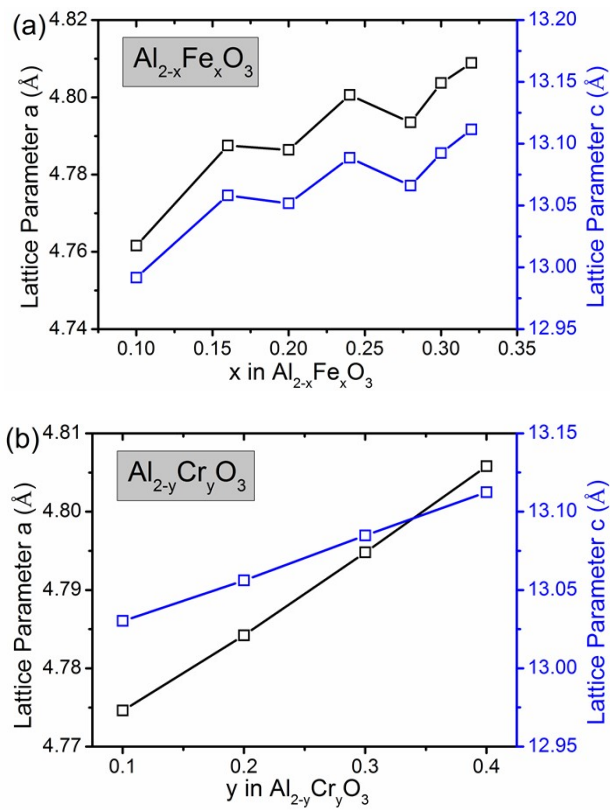

**Fig. S4** Lattice parameters as a function of the doping levels of (a)  $x$  in  $\text{Al}_{2-x}\text{Fe}_x\text{O}_3$  and (b)  $y$  in  $\text{Al}_{2-y}\text{Cr}_y\text{O}_3$ .

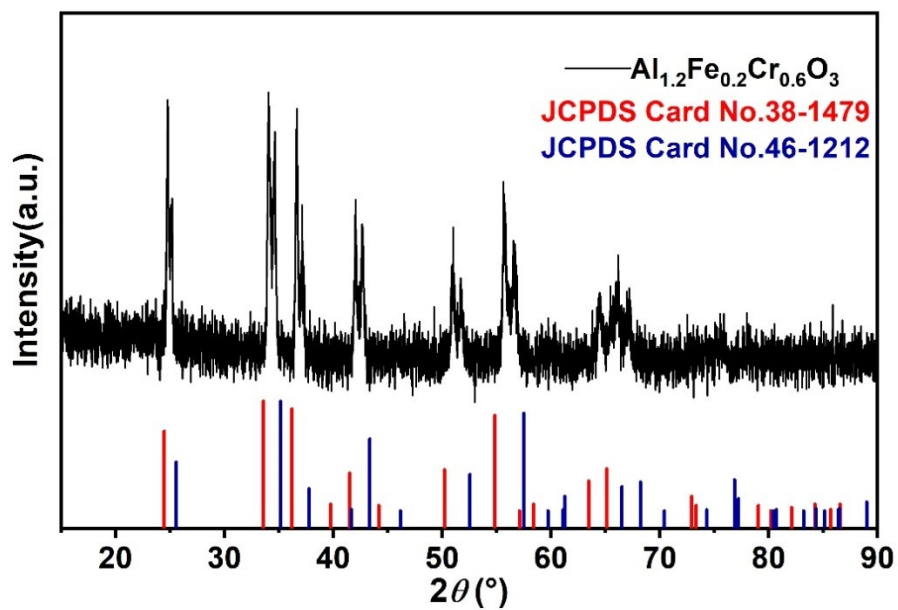

**Fig. S5** Powder X-ray diffraction data of  $\text{Al}_{1.2}\text{Fe}_{0.2}\text{Cr}_{0.6}\text{O}_3$ . vertical bars indicate the peak position and theoretical intensities of the JCPDS Card No. 46-1212 (blue) and 38-1479 (red) for  $\text{Al}_2\text{O}_3$  and  $\text{Cr}_2\text{O}_3$  respectively.

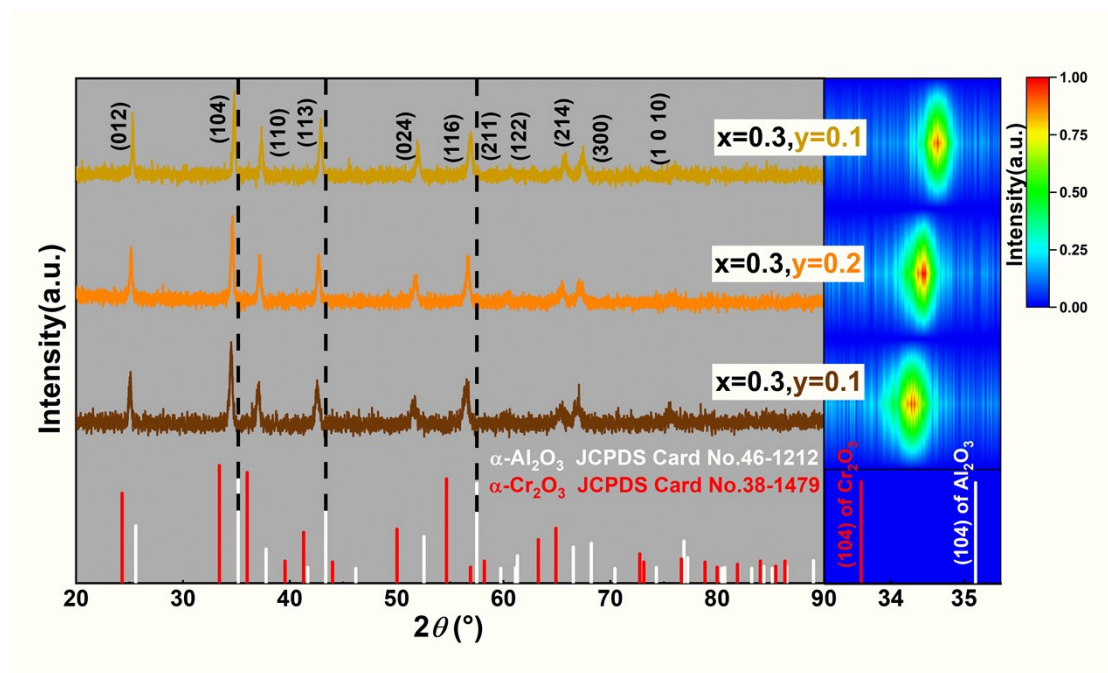

**Fig. S6** Powder X-ray diffraction data of the as-synthesized  $\text{Al}_{1.7-y}\text{Fe}_{0.3}\text{Cr}_y\text{O}_3$  samples. Vertical bars indicate the theoretical diffraction peak positions and the relative intensities of  $\alpha\text{-Al}_2\text{O}_3$  (JCPDS Card No. 46-1212) and  $\alpha\text{-Cr}_2\text{O}_3$  (JCPDS Card No. 38-1479). Dash lines mark the peak positions as a guide for the eye. Right panel depicts the contour maps of (104) diffraction peaks for different samples.

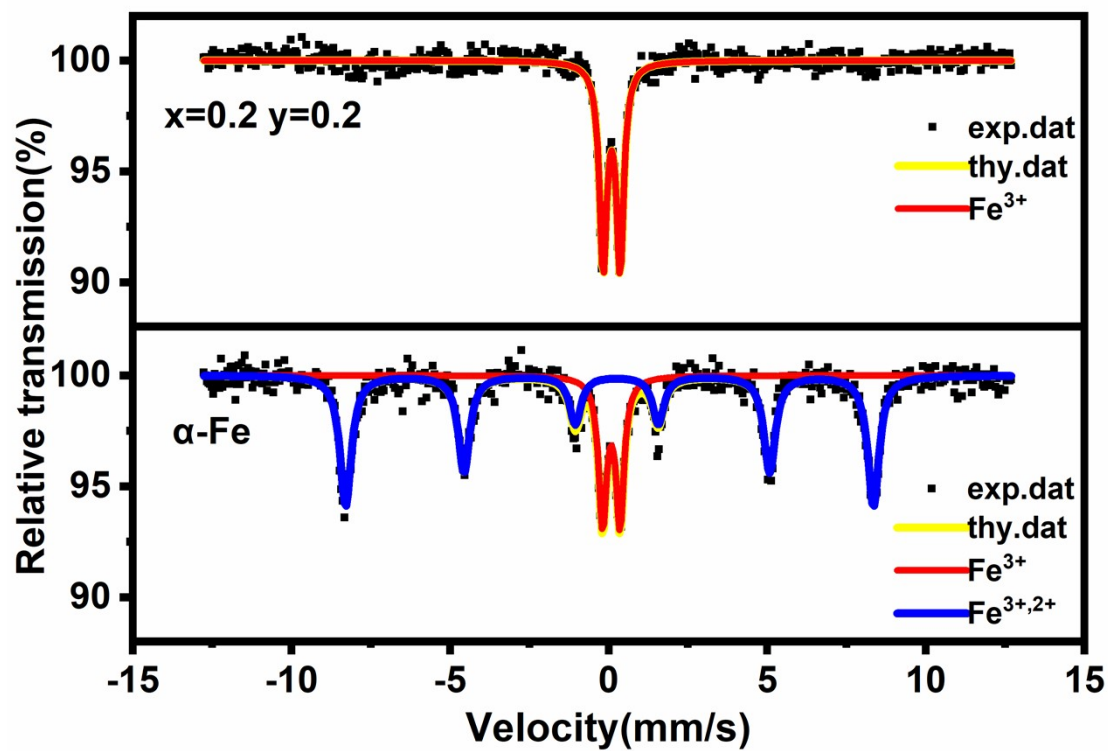

Fig. S7 Mössbauer spectra of  $\text{Al}_{1.6}\text{Fe}_{0.2}\text{Cr}_{0.2}\text{O}_3$  and the standard  $\alpha\text{-Fe}$  sample as a reference.



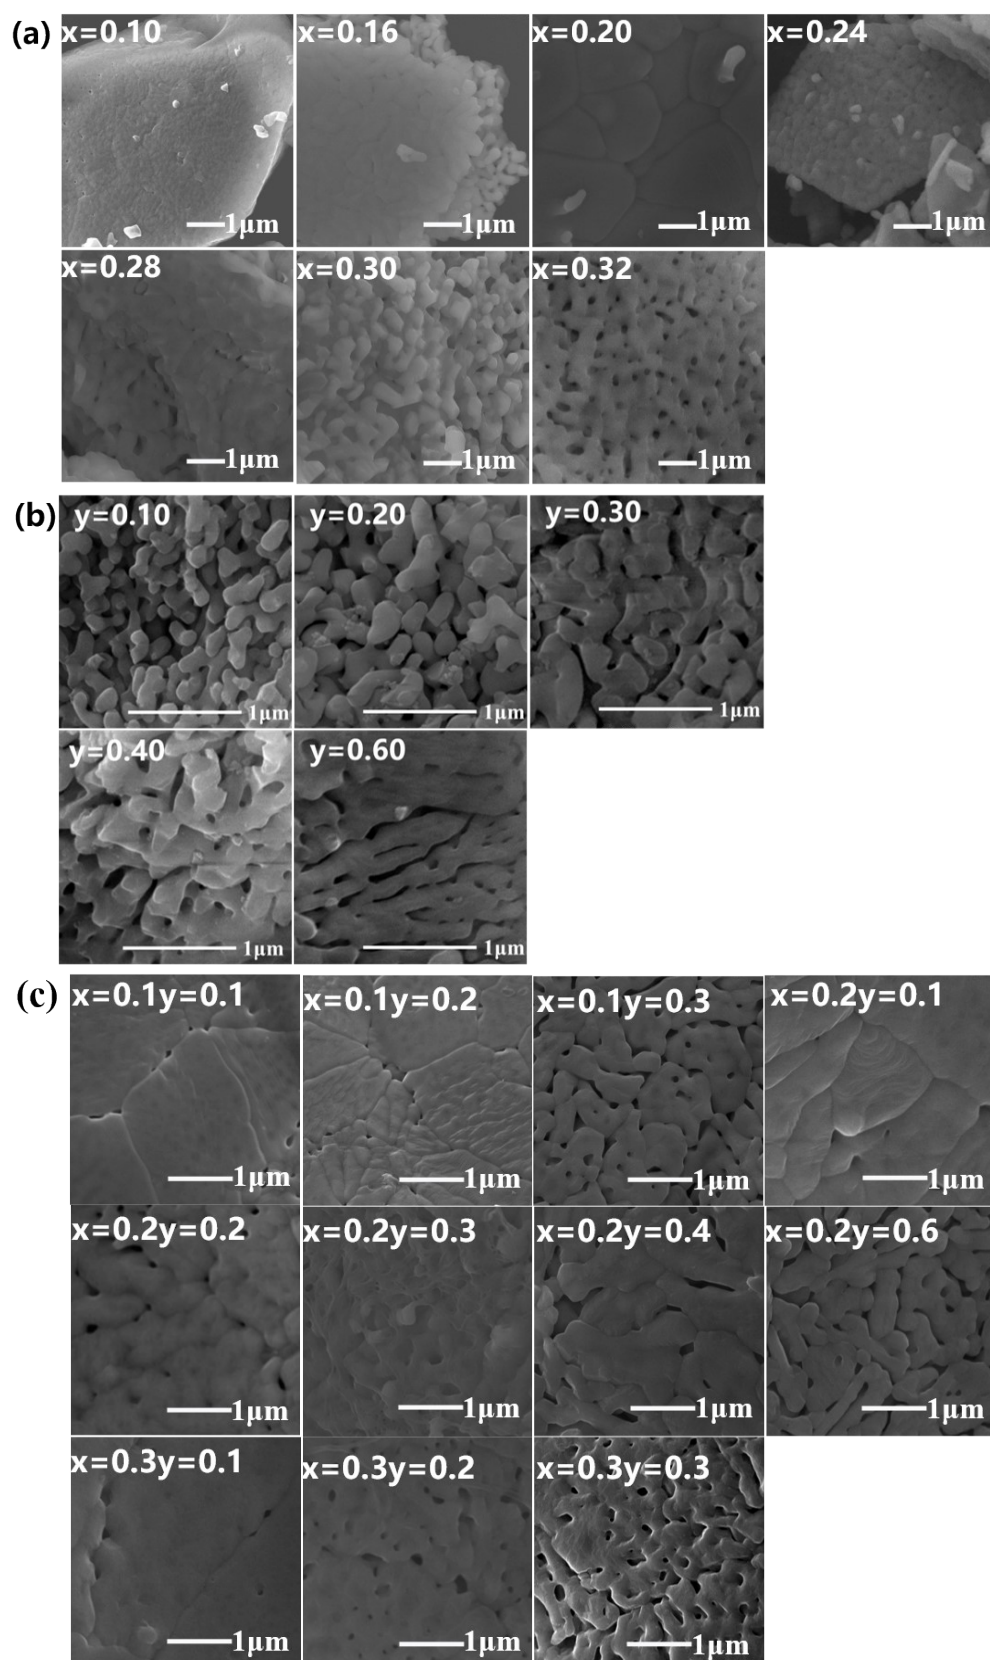

**Fig. S8** SEM graphs of the as-synthesized samples (a)  $\text{Al}_{2-x}\text{Fe}_x\text{O}_3$  (x=0.10, 0.16, 0.20, 0.24, 0.28, 0.30, 0.32), (b)  $\text{Al}_{2-y}\text{Cr}_y\text{O}_3$  (y=0.1, 0.2, 0.3, 0.4, 0.6), (c)  $\text{Al}_{2-x}\text{Fe}_x\text{Cr}_y\text{O}_3$  (x=0.1, 0.2, 0.3; y=0.1, 0.2, 0.3, 0.4, 0.6).

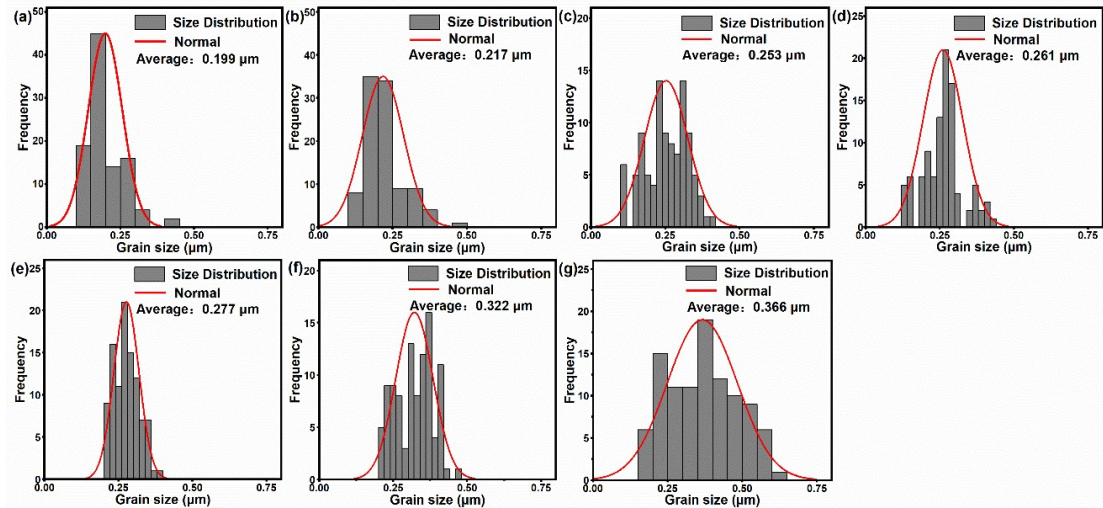

Fig. S9 Histogram graphs of the particle size distribution of the samples  $Al_{2-x}Fe_xO_3$  ( $x=0.10-0.32$ ), (a)  $x=0.10$ , (b)  $x=0.16$ , (c)  $x=0.20$ , (d)  $x=0.24$ , (e)  $x=0.28$ , (f)  $x=0.30$ , (g)  $x=0.32$ .

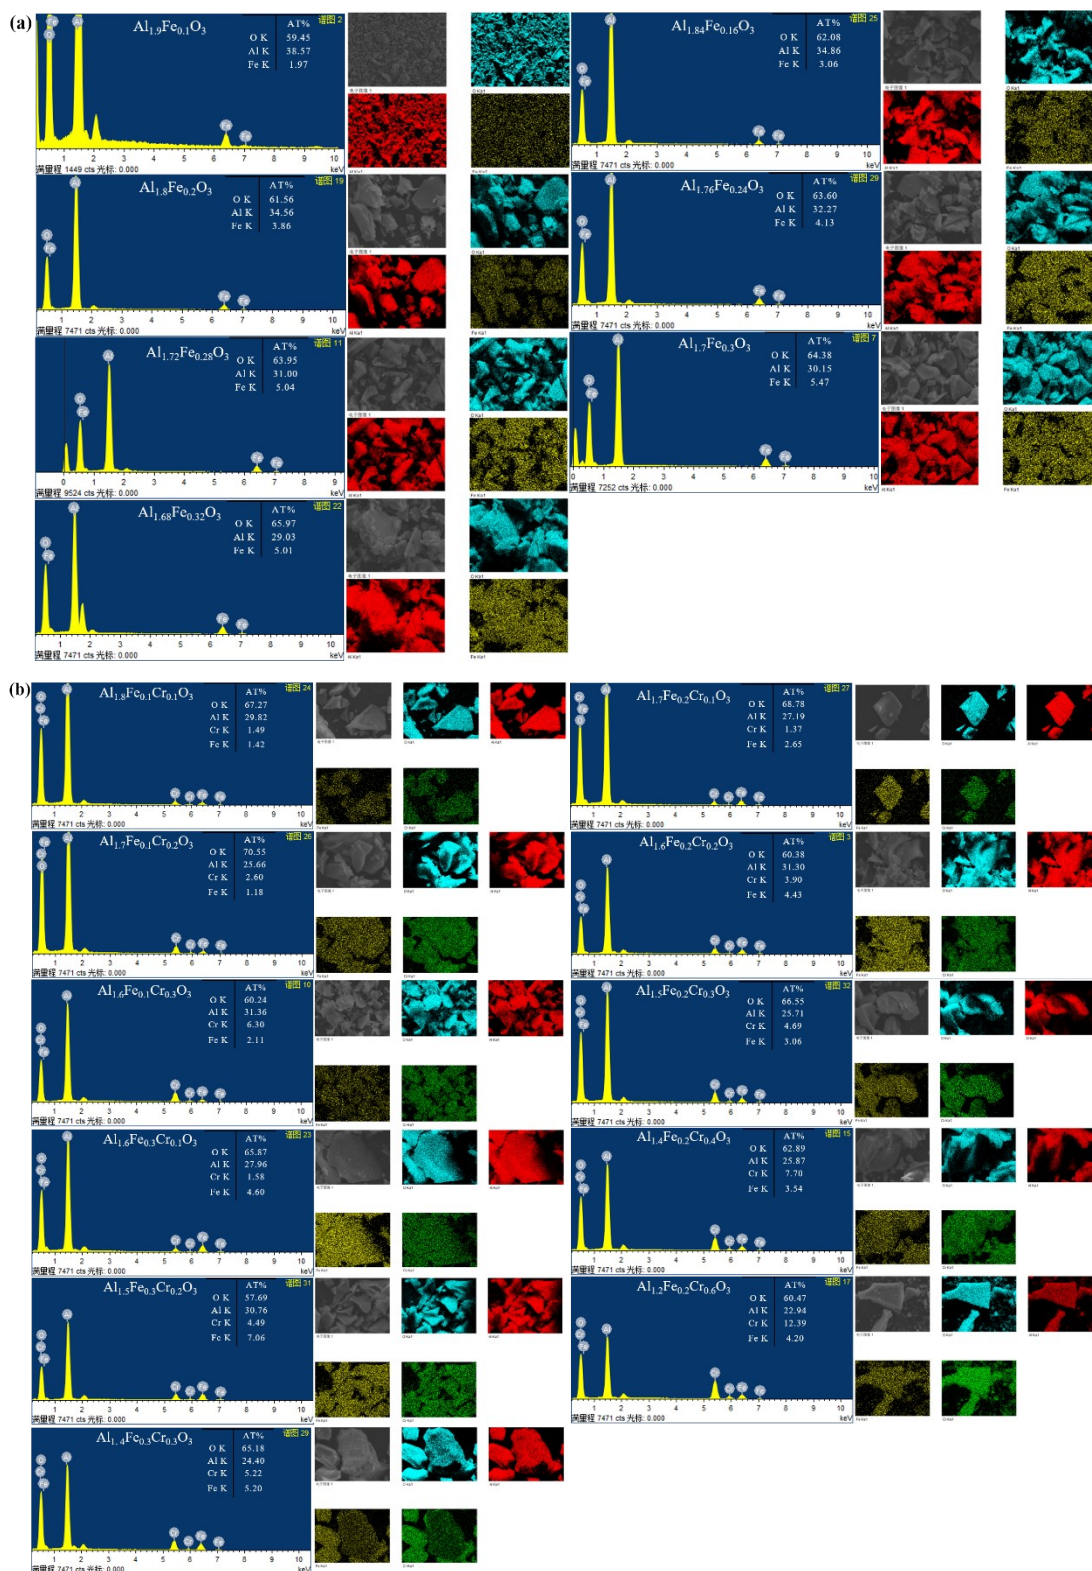

**Fig. S10** EDS and element distribution mapping graphs of the samples (a)  $Al_{2-x}Fe_xO_3$  ( $x=0.1, 0.16, 0.20, 0.24, 0.28, 0.30, 0.32$ ), (b)  $Al_{2-x}Fe_xCr_yO_3$  ( $x=0.1, 0.2, 0.3; y=0.1, 0.2, 0.3, 0.4, 0.6$ ). In the mapping graphs, O cyan, Al red, Fe yellow, and Cr green. Tables in each diagram listed the measured atomic ratio from the integration of the area of each elements in the EDS for the samples with varied stoichiometry.

**Table S1.** EDS results of atomic percentage and theoretical vs. experimental Al/Fe ratio in as-synthesized  $\text{Al}_{2-x}\text{Fe}_x\text{O}_3$  samples.

| $\text{Al}_{2-x}\text{Fe}_x\text{O}_3$ | Atomic ratio (%) |       |       | Theoretical value of Fe/Al | Experimental value of Fe/Al |
|----------------------------------------|------------------|-------|-------|----------------------------|-----------------------------|
|                                        | Fe               | Al    | O     |                            |                             |
| x=0.10                                 | 1.97             | 38.57 | 59.45 | 0.052                      | 0.051                       |
| x=0.16                                 | 3.06             | 34.86 | 62.08 | 0.087                      | 0.088                       |
| x=0.20                                 | 3.86             | 34.56 | 61.56 | 0.111                      | 0.112                       |
| x=0.24                                 | 4.13             | 32.27 | 63.60 | 0.136                      | 0.128                       |
| x=0.28                                 | 5.04             | 31.00 | 63.95 | 0.163                      | 0.162                       |
| x=0.30                                 | 5.47             | 30.15 | 64.38 | 0.176                      | 0.181                       |
| x=0.32                                 | 5.01             | 29.03 | 65.97 | 0.190                      | 0.173                       |

**Table S2.** EDS results of atomic percentage and theoretical vs. experimental Al/Fe and Al/Cr ratio in as-synthesized  $\text{Al}_{2-x-y}\text{Fe}_x\text{Cr}_y\text{O}_3$  samples.

| $\text{Al}_{2-x-y}\text{Fe}_x\text{Cr}_y\text{O}_3$ | Atomic ratio (%) |      |       |       | Theoretical value of Fe/Al | Experimental value of Fe/Al | Theoretical value of Cr/Al | Experimental value of Cr/Al |
|-----------------------------------------------------|------------------|------|-------|-------|----------------------------|-----------------------------|----------------------------|-----------------------------|
|                                                     | Fe               | Cr   | Al    | O     |                            |                             |                            |                             |
| x=0.1, y=0.1                                        | 1.42             | 1.49 | 29.82 | 67.27 | 0.056                      | 0.048                       | 0.056                      | 0.050                       |
| x=0.1, y=0.2                                        | 1.18             | 2.60 | 25.66 | 70.55 | 0.059                      | 0.046                       | 0.118                      | 0.101                       |
| x=0.1, y=0.3                                        | 2.11             | 6.30 | 31.36 | 60.24 | 0.063                      | 0.067                       | 0.188                      | 0.201                       |
| x=0.2, y=0.1                                        | 2.65             | 1.37 | 27.19 | 68.78 | 0.118                      | 0.097                       | 0.059                      | 0.050                       |
| x=0.2, y=0.2                                        | 4.43             | 3.90 | 31.30 | 60.38 | 0.125                      | 0.142                       | 0.125                      | 0.125                       |
| x=0.2, y=0.3                                        | 3.06             | 4.69 | 25.71 | 66.55 | 0.133                      | 0.119                       | 0.200                      | 0.182                       |
| x=0.3, y=0.1                                        | 4.60             | 1.58 | 27.96 | 65.87 | 0.188                      | 0.165                       | 0.063                      | 0.057                       |
| x=0.3, y=0.2                                        | 7.06             | 4.49 | 30.76 | 57.69 | 0.200                      | 0.230                       | 0.133                      | 0.146                       |
| x=0.3, y=0.3                                        | 5.20             | 5.22 | 24.40 | 65.18 | 0.214                      | 0.213                       | 0.214                      | 0.214                       |

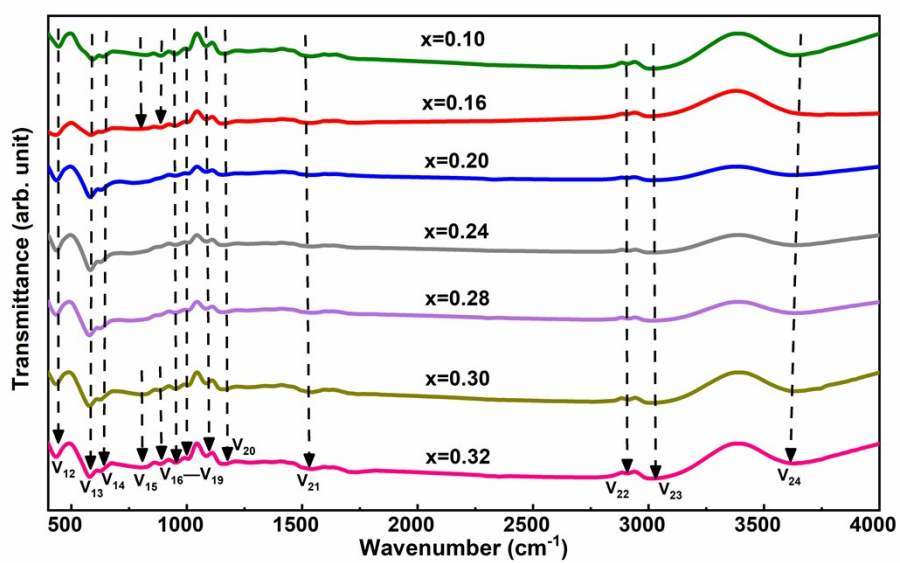

Fig. S11 Infrared spectra of  $\text{Al}_{2-x}\text{Fe}_x\text{O}_3$  samples in the wavenumber range of 400-4000  $\text{cm}^{-1}$ .

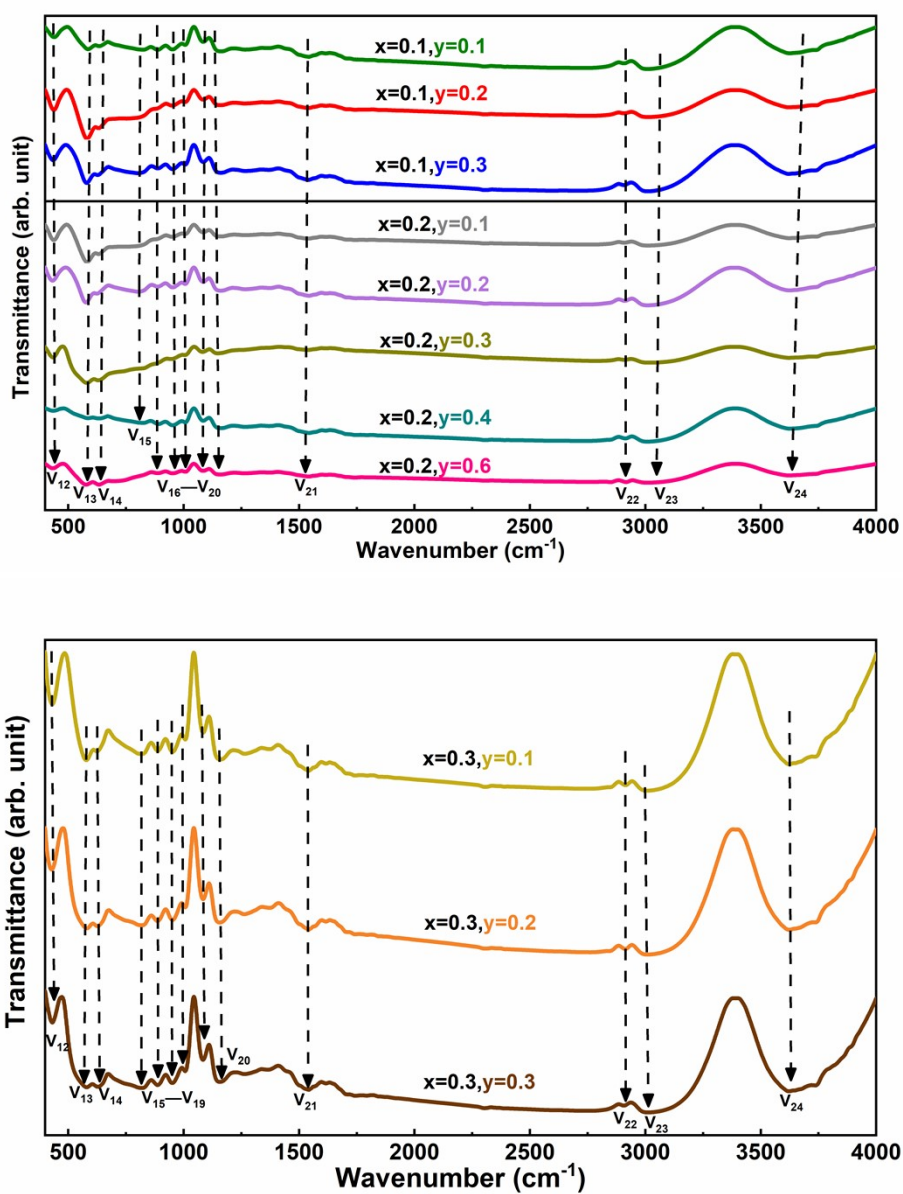

Fig. S12 Infrared spectra of  $\text{Al}_{2-x-y}\text{Fe}_x\text{Cr}_y\text{O}_3$  samples in the range of 400-4000  $\text{cm}^{-1}$ .

**Table S3.** Assignment of the Raman vibration modes of  $\text{Al}_{2-x}\text{Fe}_x\text{O}_3$  and  $\text{Al}_{2-x-y}\text{Fe}_x\text{Cr}_y\text{O}_3$  samples with varied doping levels

|            | peak position of the vibration modes in Raman spectra ( $\text{cm}^{-1}$ ) |                     |                     |                     |                     |                     |                     |                     |                     |                      |
|------------|----------------------------------------------------------------------------|---------------------|---------------------|---------------------|---------------------|---------------------|---------------------|---------------------|---------------------|----------------------|
|            | V <sub>1</sub> (Fe)                                                        | V <sub>2</sub> (Fe) | V <sub>3</sub> (Al) | V <sub>4</sub> (Al) | V <sub>5</sub> (Al) | V <sub>6</sub> (Fe) | V <sub>7</sub> (Al) | V <sub>8</sub> (Fe) | V <sub>9</sub> (Al) | V <sub>10</sub> (Al) |
|            | )                                                                          | )                   | )                   | )                   | )                   | )                   | )                   | )                   | )                   | )                    |
|            | A <sub>1g</sub>                                                            | E <sub>g</sub>      | E <sub>g</sub>      | A <sub>1g</sub>     | E <sub>g</sub>      | A <sub>1g</sub>     | E <sub>g</sub>      | E <sub>g</sub>      | A <sub>1g</sub>     | E <sub>g</sub>       |
| x=0.10     | -                                                                          | -                   | 378                 | 414                 | 434                 | -                   | 577                 | 609                 | 651                 | 750                  |
| x=0.16     | -                                                                          | -                   | 379                 | 415                 | 452                 | -                   | 566                 | 616                 | 633                 | 751                  |
| x=0.20     | -                                                                          | -                   | 377                 | 418                 | 474                 | -                   | 563                 | 628                 | 661                 | 753                  |
| x=0.24     | 236                                                                        | 302                 | -                   | 415                 | -                   | 500                 | 560                 | 627                 | 672                 | 741                  |
| x=0.28     | 234                                                                        | 302                 | -                   | 418                 | -                   | 509                 | 555                 | 628                 | 667                 | 740                  |
| x=0.30     | 234                                                                        | 301                 | -                   | 415                 | -                   | 506                 | 555                 | 624                 | 682                 | 748                  |
| x=0.32     | 233                                                                        | 300                 | -                   | 417                 | -                   | 510                 | 555                 | 618                 | 672                 | -                    |
| x=0.1,y=0. | -                                                                          | -                   | 361                 | -                   | -                   | 503                 | -                   | -                   | -                   | -                    |
| x=0.1,y=0. | -                                                                          | -                   | 372                 | -                   | -                   | 492                 | 577                 | 617                 | -                   | 785                  |
| x=0.1,y=0. | -                                                                          | -                   | 376                 | -                   | -                   | 500                 | 577                 | 621                 | 662                 | 758                  |
| x=0.2,y=0. | 235                                                                        | -                   | 381                 | 405                 | 431                 | 507                 | 560                 | 619                 | 664                 | 755                  |
| x=0.2,y=0. | 230                                                                        | -                   | 389                 | 409                 | 425                 | 492                 | 550                 | 612                 | 652                 | 743                  |
| x=0.2,y=0. | 234                                                                        | -                   | 386                 | 408                 | 436                 | 498                 | 554                 | 599                 | 647                 | 728                  |
| x=0.2,y=0. | 245                                                                        | -                   | 394                 | 406                 | 426                 | 496                 | 570                 | 597                 | 660                 | 737                  |
| x=0.2,y=0. | 265                                                                        | -                   | 392                 | 402                 | 430                 | 505                 | 572                 | 599                 | 652                 | 730                  |
| x=0.3,y=0. | 237                                                                        | -                   | 331                 | 403                 | 423                 | 488                 | 542                 | 583                 | 676                 | 766                  |
| x=0.3,y=0. | 264                                                                        | -                   | 335                 | 400                 | 453                 | 498                 | 542                 | 619                 | 640                 | 727                  |
| x=0.3,y=0. | 234                                                                        | -                   | 338                 | 402                 | 469                 | 501                 | 578                 | 617                 | 645                 | 715                  |

**Table S4.** Peaks of FT-IR transmission spectroscopy of the  $\text{Al}_{2-x}\text{Fe}_x\text{O}_3$  and  $\text{Al}_{2-x-y}\text{Fe}_x\text{Cr}_y\text{O}_3$  samples

|            | V <sub>12</sub> | V <sub>13</sub> | V <sub>14</sub> | V <sub>15</sub> | V <sub>16</sub> | V <sub>17</sub> | V <sub>18</sub> | V <sub>19</sub> | V <sub>20</sub> | V <sub>21</sub> | V <sub>22</sub> | V <sub>23</sub> | V <sub>24</sub> |
|------------|-----------------|-----------------|-----------------|-----------------|-----------------|-----------------|-----------------|-----------------|-----------------|-----------------|-----------------|-----------------|-----------------|
|            | Al-O            | Fe-O            | Al-O<br>Cr-O    | Fe-O            | Fe-O            |                 |                 |                 |                 |                 |                 |                 |                 |
| x=0.10     | 435             | 592             | 636             | 825             | 888             | 950             | 1007            | 1084            | 1159            | 1542            | 2909            | 3013            | 3628            |
| x=0.16     | 433             | 585             | 631             | 834             | 884             | 951             | 1006            | 1085            | 1159            | 1543            | 2907            | 3010            | 3625            |
| x=0.20     | 436             | 582             | 628             | -               | -               | 950             | 1006            | 1084            | 1156            | 1543            | 2907            | 3013            | 3629            |
| x=0.24     | 437             | 582             | 625             | -               | -               | 951             | 1007            | 1085            | 1158            | 1544            | 2914            | 3010            | 3632            |
| x=0.28     | 435             | 579             | 624             | -               | -               | 950             | 1007            | 1084            | 1156            | 1544            | 2914            | 3012            | 3632            |
| x=0.30     | 434             | 579             | 624             | 804             | 883             | 951             | 1007            | 1085            | 1158            | 1543            | 2913            | 3011            | 3627            |
| x=0.32     | 434             | 580             | 624             | 803             | 885             | 951             | 1007            | 1085            | 1162            | 1543            | 2907            | 3012            | 3631            |
| x=0.1,y=0. | 440             | 586             | 634             | 824             | 888             | 952             | 1007            | 1085            | 1162            | 1542            | 2907            | 3000            | 3628            |
| x=0.1,y=0. | 438             | 582             | 632             | 803             | 889             | 950             | 1007            | 1084            | 1158            | 1542            | 2909            | 3011            | 3623            |
| x=0.1,y=0. | 435             | 580             | 628             | 802             | 888             | 952             | 1007            | 1085            | 1162            | 1543            | 2924            | -               | 3430            |
| x=0.2,y=0. | 438             | 582             | 632             | 828             | 889             | 952             | 1007            | 1085            | 1161            | 1542            | 2910            | 3010            | 3621            |
| x=0.2,y=0. | 432             | 577             | 624             | 803             | 888             | 953             | 1007            | 1085            | 1162            | 1543            | 2911            | 3010            | 3627            |
| x=0.2,y=0. | 434             | 581             | 631             | 816             | 889             | 954             | 1005            | 1082            | 1148            | 1542            | 2909            | 3015            | 3622            |
| x=0.2,y=0. | 434             | 586             | 634             | 824             | 891             | 953             | 1007            | 1085            | 1160            | 1543            | 2913            | 3001            | 3628            |
| x=0.2,y=0. | 433             | 577             | 634             | -               | 888             | 953             | 1008            | 1084            | 1158            | 1542            | 2917            | 3009            | 3623            |
| x=0.3,y=0. | 431             | 578             | 625             | 820             | 888             | 952             | 1007            | 1085            | 1159            | 1617            | 2914            | 3009            | 3623            |
| x=0.3,y=0. | 429             | 581             | 627             | 821             | 887             | 952             | 1007            | 1084            | 1156            | 1543            | 2913            | 3009            | 3624            |
| x=0.3,y=0. | 431             | 580             | 628             | 821             | 887             | 951             | 1007            | 1084            | 1156            | 1542            | 2907            | 3011            | 3622            |



**Table S5.** The CIE-L\*a\*b\* numerical value results of Al<sub>2-x</sub>Fe<sub>x</sub>O<sub>3</sub> with varied Fe-doping levels

| x<br>T | x=0.10 |    |    | x=0.16 |    |    | x=0.20 |    |    | x=0.24 |    |    | x=0.28 |    |    | x=0.30 |    |    | x=0.32 |    |    |
|--------|--------|----|----|--------|----|----|--------|----|----|--------|----|----|--------|----|----|--------|----|----|--------|----|----|
|        | L*     | a* | b* |
| 50°C   | 76     | 3  | 18 | 78     | 5  | 30 | 70     | 10 | 36 | 63     | 21 | 39 | 53     | 30 | 39 | 47     | 31 | 32 | 46     | 44 | 45 |
| 75°C   | 76     | 3  | 20 | 75     | 5  | 31 | 71     | 10 | 36 | 61     | 20 | 36 | 52     | 30 | 37 | 52     | 31 | 33 | 46     | 44 | 44 |
| 100°C  | 77     | 3  | 20 | 75     | 6  | 35 | 70     | 9  | 40 | 60     | 22 | 37 | 46     | 31 | 38 | 50     | 30 | 34 | 44     | 43 | 43 |
| 125°C  | 73     | 3  | 19 | 70     | 4  | 34 | 62     | 11 | 39 | 47     | 21 | 36 | 40     | 31 | 43 | 46     | 28 | 33 | 35     | 40 | 49 |
| 150°C  | 75     | 4  | 20 | 67     | 5  | 38 | 59     | 11 | 37 | 47     | 21 | 37 | 38     | 29 | 40 | 49     | 26 | 27 | 31     | 38 | 44 |
| 175°C  | 74     | 3  | 19 | 69     | 5  | 36 | 59     | 12 | 41 | 51     | 22 | 42 | 40     | 30 | 47 | 45     | 25 | 27 | 34     | 39 | 44 |
| 200°C  | 75     | 3  | 21 | 72     | 4  | 37 | 64     | 10 | 41 | 51     | 18 | 39 | 45     | 29 | 44 | 48     | 26 | 27 | 36     | 38 | 44 |
| 225°C  | 76     | 3  | 19 | 72     | 3  | 36 | 62     | 10 | 42 | 52     | 20 | 37 | 42     | 28 | 40 | 46     | 23 | 23 | 33     | 36 | 39 |
| 250°C  | 74     | 4  | 24 | 67     | 5  | 29 | 60     | 9  | 31 | 52     | 16 | 30 | 43     | 23 | 32 | 41     | 24 | 28 | 36     | 33 | 33 |
| 275°C  | 75     | 3  | 20 | 66     | 4  | 28 | 58     | 8  | 30 | 51     | 15 | 28 | 42     | 22 | 32 | 43     | 22 | 25 | 36     | 30 | 31 |
| 300°C  | 71     | 3  | 20 | 61     | 4  | 39 | 52     | 9  | 35 | 46     | 17 | 33 | 36     | 21 | 34 | 33     | 20 | 19 | 30     | 29 | 33 |
| 325°C  | 74     | 3  | 20 | 58     | 6  | 36 | 49     | 10 | 30 | 44     | 18 | 31 | 31     | 21 | 29 | 40     | 20 | 21 | 27     | 26 | 29 |
| 350°C  | 74     | 3  | 21 | 62     | 3  | 27 | 58     | 7  | 27 | 51     | 13 | 24 | 43     | 16 | 23 | 39     | 18 | 21 | 37     | 21 | 20 |
| 375°C  | 71     | 3  | 21 | 64     | 6  | 28 | 57     | 9  | 27 | 52     | 13 | 23 | 41     | 17 | 23 | 34     | 16 | 14 | 37     | 20 | 19 |
| 400°C  | 73     | 3  | 21 | 62     | 6  | 34 | 50     | 9  | 34 | 40     | 15 | 26 | 28     | 16 | 22 | 39     | 16 | 18 | 27     | 19 | 20 |
| 425°C  | 73     | 2  | 22 | 72     | 5  | 28 | 64     | 7  | 27 | 57     | 13 | 25 | 38     | 12 | 21 | 41     | 14 | 19 | 28     | 18 | 18 |
| 450°C  | 69     | 3  | 22 | 66     | 5  | 38 | 52     | 11 | 35 | 47     | 12 | 29 | 34     | 15 | 24 | 31     | 14 | 16 | 25     | 17 | 17 |
| 475°C  | 68     | 3  | 21 | 65     | 5  | 30 | 54     | 9  | 33 | 42     | 13 | 24 | 26     | 15 | 20 | 27     | 12 | 14 | 18     | 17 | 14 |
| 500°C  | 67     | 3  | 23 | 73     | 6  | 35 | 60     | 7  | 34 | 49     | 12 | 27 | 33     | 13 | 22 | 34     | 13 | 17 | 32     | 18 | 21 |
| 525°C  | 66     | 3  | 21 | 65     | 4  | 28 | 58     | 8  | 29 | 53     | 10 | 23 | 36     | 12 | 17 | 25     | 10 | 11 | 34     | 14 | 16 |
| 550°C  | 68     | 3  | 22 | 74     | 4  | 37 | 62     | 9  | 38 | 54     | 12 | 30 | 40     | 13 | 25 | 32     | 12 | 14 | 31     | 14 | 19 |

**Table S6.** The CIE-L\*a\*b\* numerical value results of Al<sub>2-y</sub>Cr<sub>y</sub>O<sub>3</sub> with varied Cr-doping levels

| T \ y | y=0.1 |    |    | y=0.2 |    |    | y=0.3 |    |    | y=0.4 |    |    | y=0.6 |     |    |
|-------|-------|----|----|-------|----|----|-------|----|----|-------|----|----|-------|-----|----|
|       | L*    | a* | b* | L*    | a*  | b* |
| 50°C  | 53    | 4  | -1 | 52    | 10 | -3 | 47    | 5  | -1 | 46    | 1  | 0  | 42    | -7  | 5  |
| 75°C  | 52    | 3  | 0  | 52    | 8  | 1  | 47    | 5  | -1 | 44    | 0  | 1  | 43    | -8  | 7  |
| 100°C | 54    | 3  | 1  | 53    | 7  | 0  | 49    | 3  | 1  | 44    | -1 | 3  | 43    | -9  | 7  |
| 125°C | 45    | 2  | 0  | 49    | 5  | 1  | 43    | 3  | 1  | 40    | -2 | 2  | 35    | -8  | 7  |
| 150°C | 47    | 1  | 0  | 51    | 3  | 1  | 45    | 0  | 1  | 42    | -4 | 3  | 41    | -10 | 6  |
| 175°C | 49    | 2  | -1 | 50    | 2  | 0  | 44    | 0  | 1  | 42    | -3 | 2  | 37    | -10 | 6  |
| 200°C | 48    | 2  | 0  | 52    | 3  | 1  | 47    | -1 | 3  | 43    | -5 | 5  | 41    | -10 | 7  |
| 225°C | 49    | 1  | 0  | 52    | 1  | 0  | 45    | -2 | 2  | 44    | -5 | 3  | 42    | -8  | 6  |
| 250°C | 45    | 0  | -1 | 47    | -1 | 3  | 43    | -5 | 5  | 39    | -5 | 4  | 35    | -10 | 9  |
| 275°C | 54    | 1  | 0  | 51    | 0  | 1  | 45    | -4 | 3  | 40    | -5 | 3  | 39    | -9  | 7  |
| 300°C | 44    | 0  | 1  | 44    | 0  | 1  | 35    | -4 | 3  | 35    | -5 | 4  | 35    | -9  | 7  |
| 325°C | 49    | 0  | 1  | 51    | -2 | 3  | 45    | -4 | 3  | 43    | -6 | 6  | 42    | -12 | 9  |
| 350°C | 46    | -1 | 3  | 49    | -1 | 3  | 42    | -4 | 4  | 41    | -6 | 6  | 35    | -7  | 5  |
| 375°C | 50    | -1 | 3  | 49    | -2 | 5  | 47    | -6 | 5  | 41    | -7 | 5  | 40    | -10 | 9  |
| 400°C | 42    | 1  | 4  | 50    | -3 | 4  | 43    | -2 | 3  | 40    | -6 | 7  | 38    | -9  | 8  |
| 425°C | 50    | 2  | 3  | 49    | -2 | 5  | 39    | -2 | 5  | 43    | -8 | 7  | 32    | -9  | 9  |
| 450°C | 44    | 0  | 3  | 45    | -3 | 5  | 38    | -5 | 5  | 34    | -6 | 6  | 32    | -5  | 7  |
| 475°C | 38    | 0  | 1  | 43    | -2 | 5  | 31    | -3 | 5  | 32    | -7 | 6  | 34    | -7  | 8  |
| 500°C | 41    | -1 | 3  | 47    | -4 | 8  | 40    | -6 | 7  | 39    | -7 | 8  | 33    | -9  | 9  |
| 525°C | 35    | -2 | 4  | 44    | -5 | 5  | 31    | -5 | 4  | 34    | -5 | 7  | 33    | -9  | 9  |
| 550°C | 38    | 0  | 3  | 44    | -3 | 5  | 40    | -6 | 7  | 35    | -6 | 6  | 30    | -9  | 7  |

**Table S7.** The CIE-L\*a\*b\* values of Al<sub>2-x-y</sub>Fe<sub>x</sub>Cr<sub>y</sub>O<sub>3</sub> with varied Fe,Cr co-doping levels

| x,y<br>T | 0.1,0.1  | 0.1,0.2  | 0.1,0.3  | 0.2,0.1  | 0.2,0.2  | 0.2,0.3  | 0.2,0.4  | 0.2,0.6  | 0.3,0.1  | 0.3,0.2  | 0.3,0.3  |
|----------|----------|----------|----------|----------|----------|----------|----------|----------|----------|----------|----------|
|          | L*,a*,b* |
| 50°C     | 51,6,24  | 34,5,17  | 30,2,16  | 34,6,21  | 27,4,18  | 18,3,11  | 16,2,10  | 11,1,5   | 24,11,13 | 18,7,10  | 16,5,9   |
| 75°C     | 54,6,25  | 40,4,20  | 30,3,20  | 34,8,21  | 27,4,18  | 19,3,11  | 11,1,9   | 11,1,5   | 23,9,13  | 18,7,9   | 18,5,9   |
| 100°C    | 45,4,24  | 30,3,17  | 25,3,14  | 33,6,21  | 26,4,18  | 16,2,12  | 9,2,5    | 9,0,4    | 21,9,13  | 15,7,9   | 19,5,9   |
| 125°C    | 43,4,25  | 31,3,21  | 23,4,21  | 32,6,30  | 26,5,23  | 15,5,15  | 11,3,9   | 7,1,4    | 21,13,21 | 15,6,12  | 11,9,9   |
| 150°C    | 40,4,27  | 28,2,19  | 21,4,18  | 32,5,28  | 25,5,24  | 11,3,11  | 11,2,10  | 5,2,2    | 19,11,19 | 14,6,12  | 10,5,7   |
| 175°C    | 46,5,26  | 26,1,22  | 24,2,23  | 26,4,27  | 22,5,22  | 8,3,7    | 9,3,7    | 3,2,2    | 14,8,15  | 6,3,4    | 7,3,6    |
| 200°C    | 50,5,27  | 38,2,20  | 24,3,22  | 23,6,24  | 19,4,17  | 11,2,10  | 8,4,6    | 4,3,1    | 14,8,15  | 13,7,10  | 15,7,9   |
| 225°C    | 45,6,25  | 34,1,21  | 22,3,20  | 22,5,23  | 17,4,19  | 9,4,9    | 8,3,4    | 3,2,2    | 14,10,15 | 10,5,9   | 9,6,7    |
| 250°C    | 46,3,23  | 32,1,17  | 28,3,17  | 34,5,26  | 29,4,23  | 21,5,14  | 13,3,9   | 6,2,3    | 20,9,13  | 17,7,11  | 10,5,9   |
| 275°C    | 44,2,21  | 28,1,18  | 27,3,18  | 34,5,26  | 32,7,26  | 22,5,13  | 12,3,8   | 7,1,4    | 23,11,14 | 18,7,11  | 14,5,7   |
| 300°C    | 40,4,24  | 25,2,21  | 22,4,17  | 29,6,29  | 21,6,25  | 11,3,9   | 8,3,8    | 4,2,2    | 18,8,15  | 9,5,8    | 6,4,5    |
| 325°C    | 42,4,26  | 29,2,21  | 19,4,17  | 28,7,27  | 19,6,21  | 12,5,10  | 10,3,9   | 4,1,3    | 13,8,15  | 11,7,9   | 10,5,7   |
| 350°C    | 52,2,23  | 38,0,18  | 33,3,16  | 42,5,23  | 40,4,20  | 22,4,11  | 26,3,9   | 21,2,5   | 29,7,14  | 22,7,8   | 20,4,7   |
| 375°C    | 51,2,22  | 36,1,17  | 34,3,17  | 37,6,21  | 35,5,18  | 29,3,12  | 25,3,9   | 22,1,7   | 27,8,10  | 23,6,9   | 21,3,6   |
| 400°C    | 40,2,23  | 29,0,16  | 23,3,15  | 22,6,19  | 30,6,19  | 16,3,10  | 11,2,4   | 10,2,3   | 19,3,13  | 13,7,8   | 11,5,6   |
| 425°C    | 44,1,20  | 33,1,14  | 26,2,15  | 32,6,18  | 32,5,15  | 23,2,11  | 20,3,6   | 15,0,5   | 21,7,12  | 22,7,8   | 19,4,8   |
| 450°C    | 48,4,26  | 29,1,17  | 26,5,16  | 30,6,21  | 21,7,17  | 22,3,11  | 10,3,4   | 12,2,6   | 21,7,11  | 13,7,9   | 13,6,7   |
| 475°C    | 42,1,24  | 24,1,15  | 23,3,14  | 23,5,16  | 23,5,15  | 12,5,7   | 10,1,5   | 17,6,12  | 20,7,11  | 11,6,6   | 11,4,6   |
| 500°C    | 45,2,24  | 32,0,16  | 28,3,14  | 29,5,22  | 26,5,16  | 17,3,10  | 14,3,8   | 12,5,4   | 25,5,12  | 19,5,9   | 16,4,4   |
| 525°C    | 46,1,20  | 31,1,14  | 26,3,12  | 31,5,19  | 27,5,14  | 18,4,7   | 17,2,5   | 12,2,3   | 23,8,8   | 16,6,5   | 15,5,6   |
| 550°C    | 50,3,28  | 35,0,20  | 28,4,15  | 26,5,16  | 23,4,15  | 12,3,6   | 11,1,6   | 9,0,2    | 18,7,10  | 11,5,4   | 10,5,3   |

Table S8 Assignments of the absorption bands of  $\text{Al}_{2-x}\text{Fe}_x\text{O}_3$  samples.

| x      | ${}^6\text{A}_{1g} \rightarrow {}^4\text{T}_{1g}({}^4\text{P})$ | ${}^6\text{A}_{1g} \rightarrow {}^4\text{E}_g({}^4\text{D})$ | ${}^6\text{A}_{1g} \rightarrow {}^4\text{E}_g, {}^4\text{A}_{1g}$ | $2({}^6\text{A}_{1g}) \rightarrow 2[{}^4\text{T}_{1g}({}^4\text{G})]$ |
|--------|-----------------------------------------------------------------|--------------------------------------------------------------|-------------------------------------------------------------------|-----------------------------------------------------------------------|
| x=0.10 | 259                                                             | 378                                                          | 455                                                               | 527                                                                   |
| x=0.16 | 274                                                             | 382                                                          | 456                                                               | 531                                                                   |
| x=0.20 | 274                                                             | 382                                                          | 457                                                               | 531                                                                   |
| x=0.24 | 281                                                             | 387                                                          | 457                                                               | 532                                                                   |
| x=0.28 | 298                                                             | 388                                                          | 463                                                               | 535                                                                   |
| x=0.30 | 300                                                             | 386                                                          | 450                                                               | 538                                                                   |
| x=0.32 | 301                                                             | 390                                                          | 464                                                               | 545                                                                   |

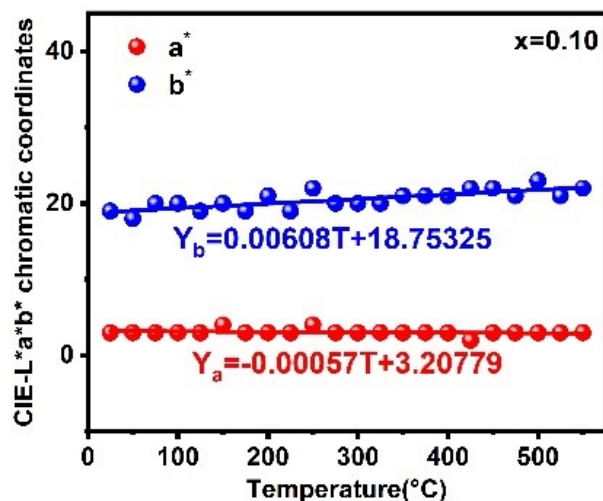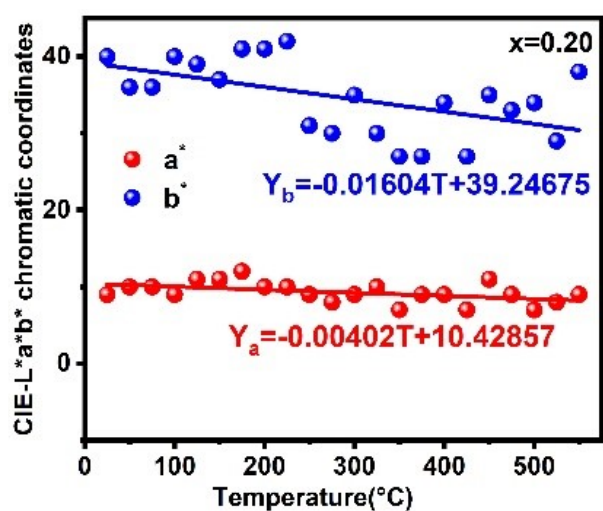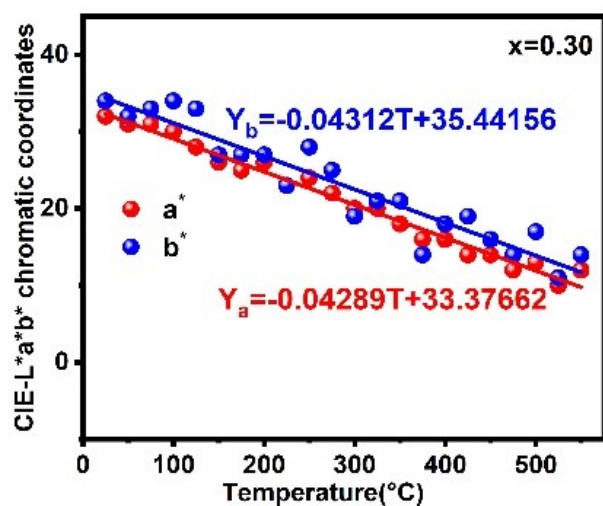

Fig. S13 Chromatic coordinates of  $a^*$  and  $b^*$  as a function of temperature for the  $Al_{2-x}Fe_xO_3$  samples with  $x=0.10$ ,  $0.20$ , and  $0.30$ , respectively.

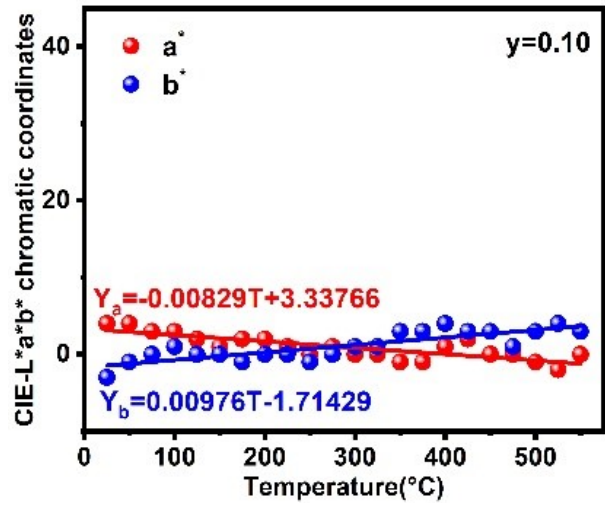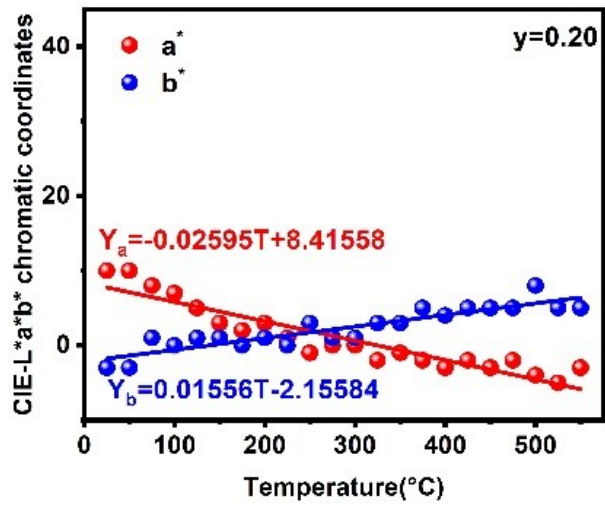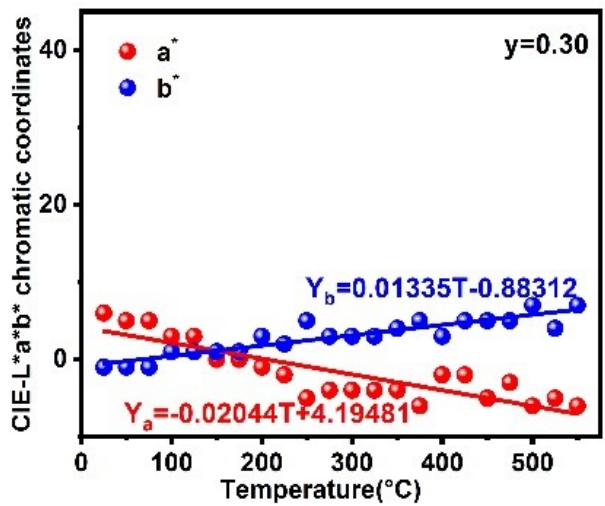

Fig. S14 Chromatic coordinates of  $a^*$  and  $b^*$  as a function of temperature for the  $\text{Al}_{2-y}\text{Cr}_y\text{O}_3$  samples with  $y=0.10, 0.20,$  and  $0.30,$  respectively.

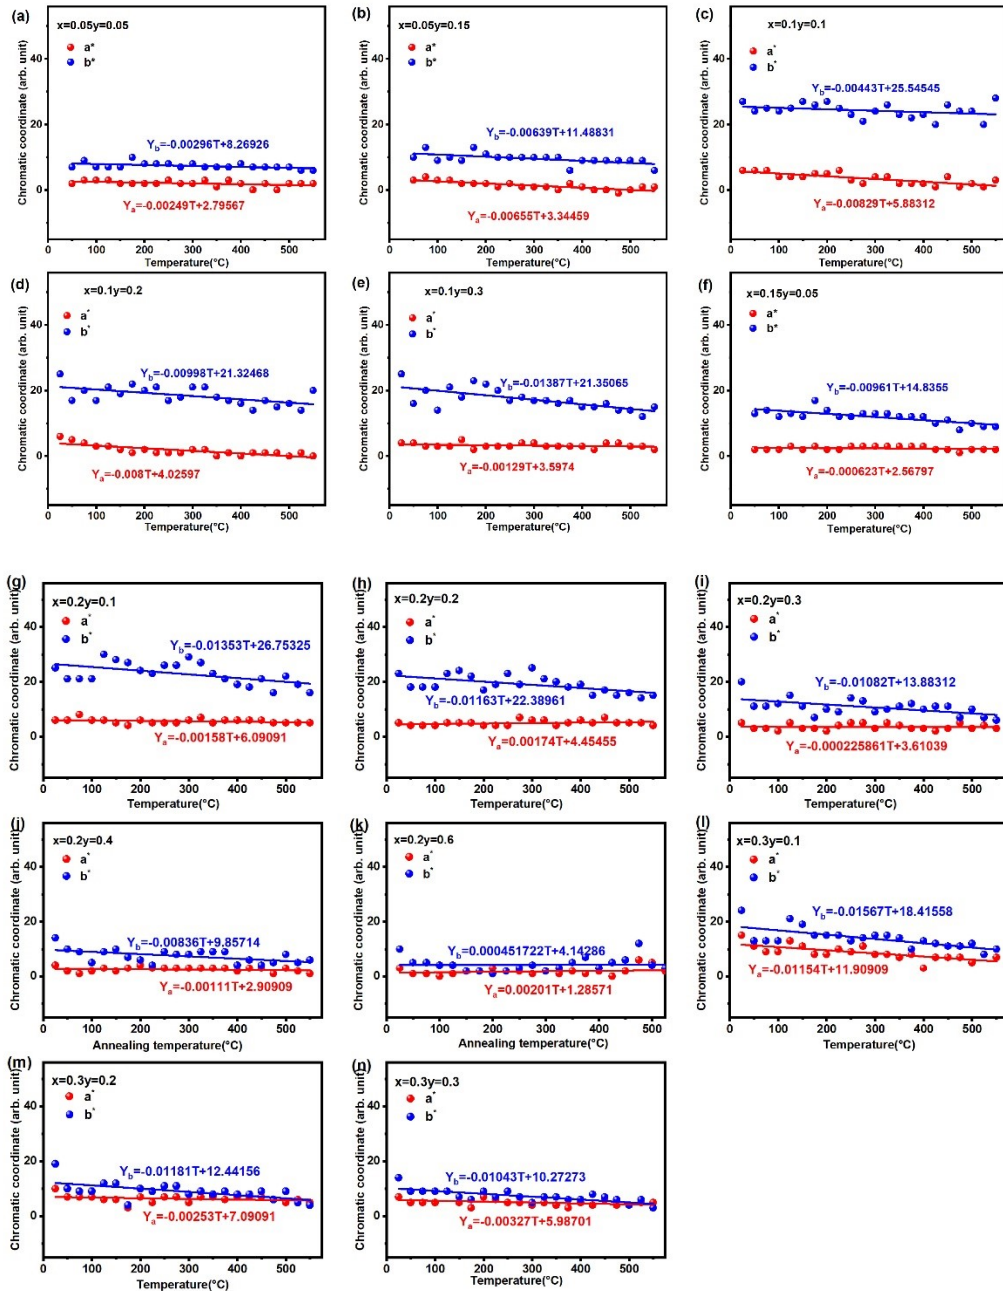

**Fig. S15** Chromatic coordinates of  $a^*$  and  $b^*$  as a function of temperature for the  $\text{Al}_{2-x-y}\text{Fe}_x\text{Cr}_y\text{O}_3$  samples with  $x=0.05, 0.1, 0.15, 0.2, 0.3$  and  $y=0.05, 0.1, 0.15, 0.2, 0.3, 0.4, 0.6$ , respectively.

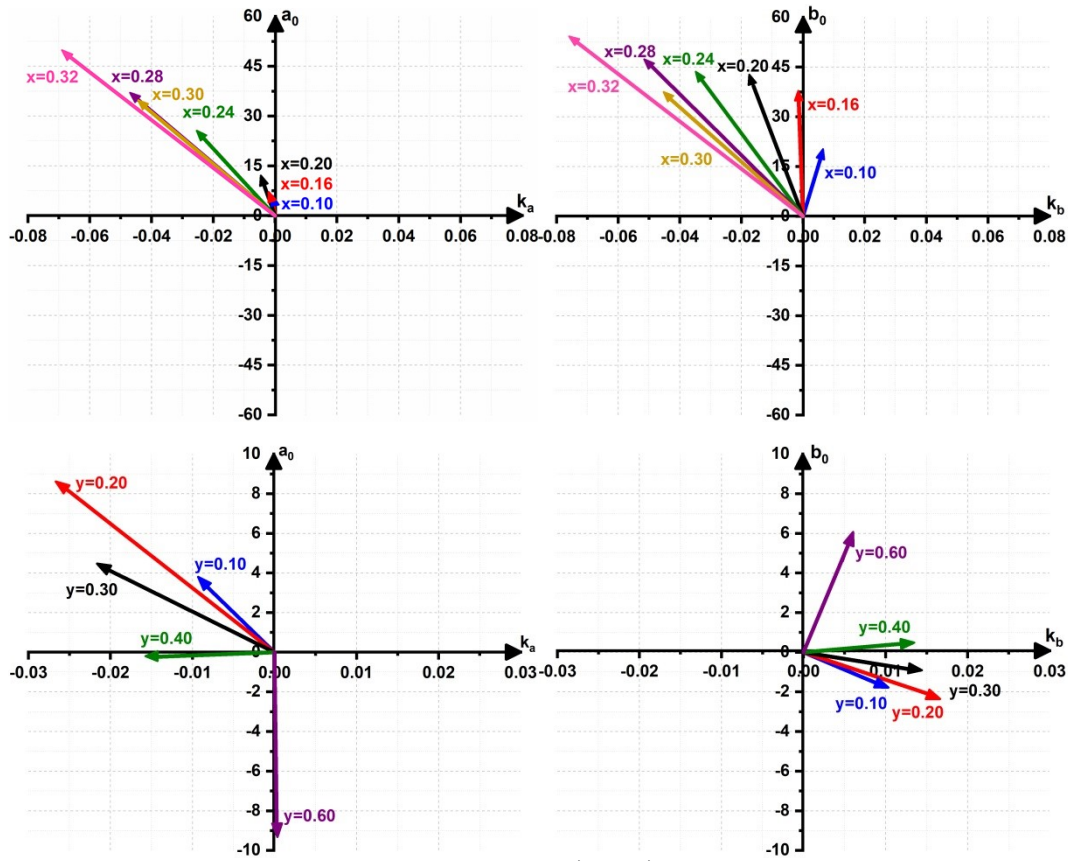

Fig. S16 Thermochromic coordinate vectors of the  $\vec{a}$  and  $\vec{b}$  of  $Al_{2-x}Fe_xO_3$  and  $Al_{2-y}Cr_yO_3$  materials.



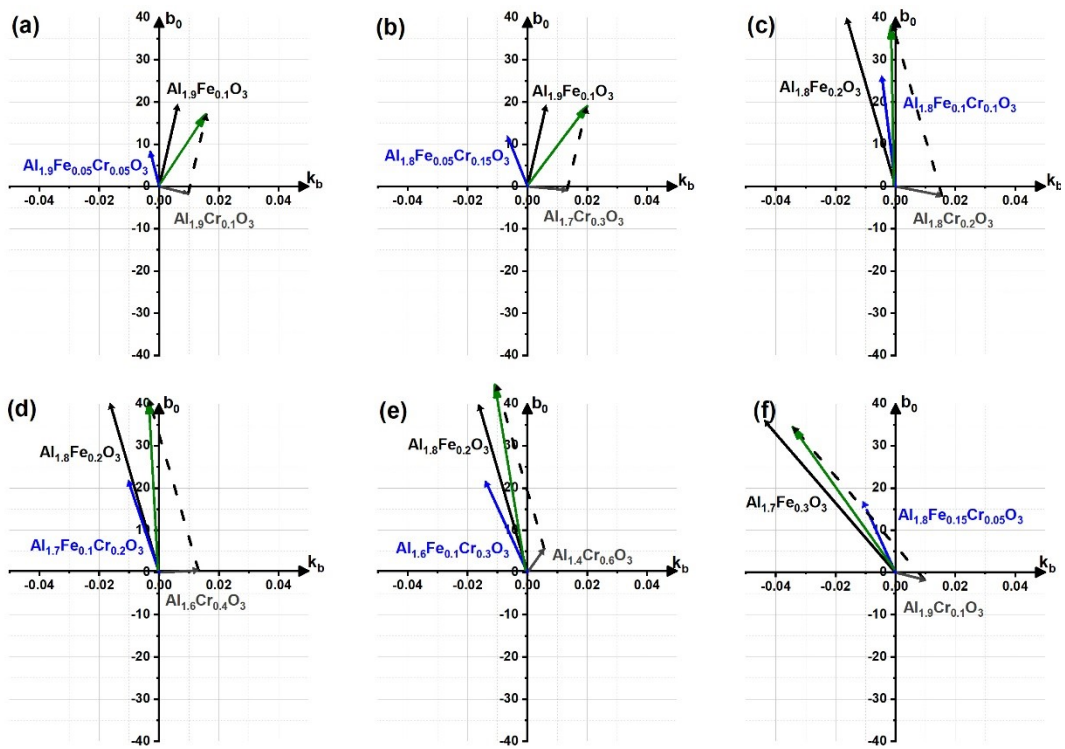

**Fig. S17** (a)-(f) The fitting line of the color coordinate b-value function corresponding to different doping ratios. The black line is Fe doped  $Al_2O_3$ , the gray line is Cr doped  $Al_2O_3$ , the blue line is Fe Cr co-doped  $Al_2O_3$ , and the green line It is obtained by doing vector lines for black and gray.
